# Supplementary figures and images for: Direct synthesis of ordered mesoporous silica functionalized by Si–H groups
Source: Royal Society of Chemistry journal article supplement (doi:10.1039/b601851c), 2006-01-01

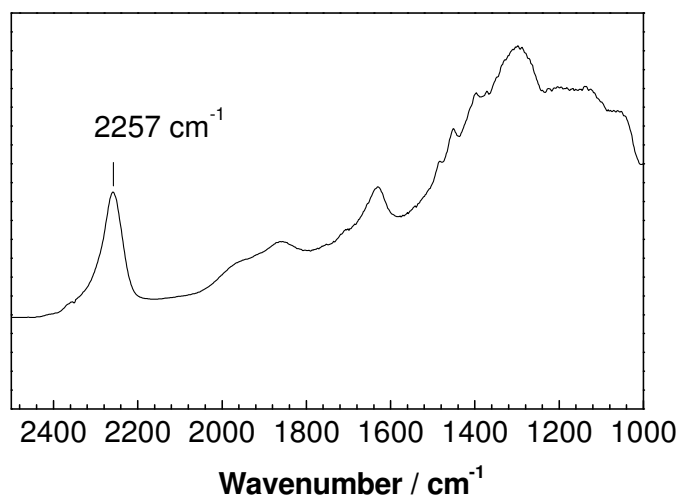

**Fig. SM1:** FTIR spectrum of H-MTS.

Supplement: b601851c.pdf [file b601851c.pdf]
